# Supplementary material
Source: PubMed Central journal article supplement (PMC7959923)
Supplement: 16-01027.pdf [file 16-01027.pdf]

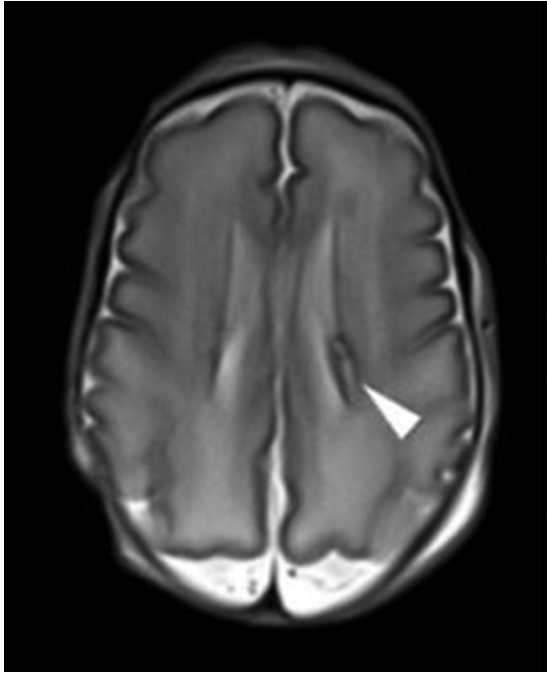

**ON-LINE FIG 1.** Cerebral WM, cystic lesion, focal unilateral, score 1 (axial T2).

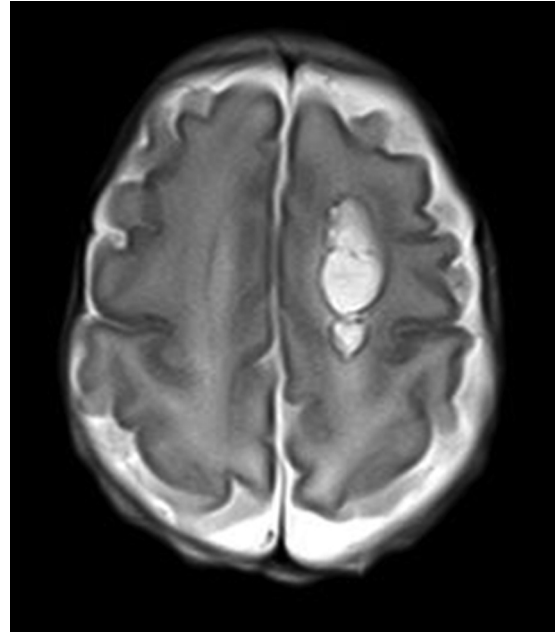

**ON-LINE FIG 3.** Cerebral WM, cystic lesion, extensive unilateral, score 3 (axial T2).

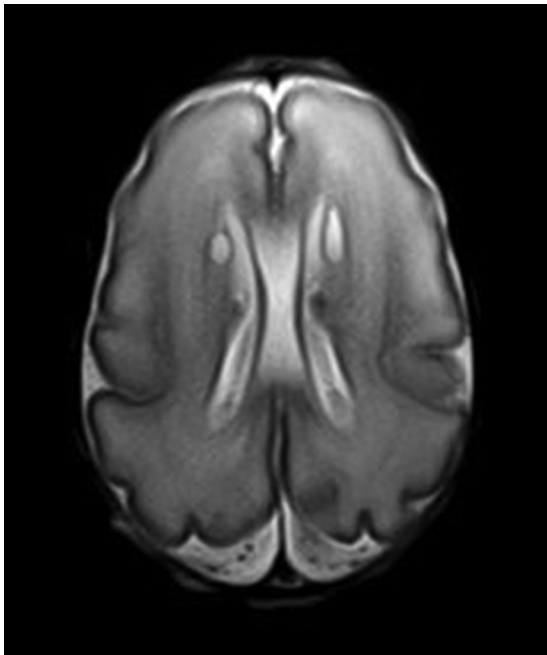

**ON-LINE FIG 2.** Cerebral WM, cystic lesion, focal bilateral, score 2 (axial T2).

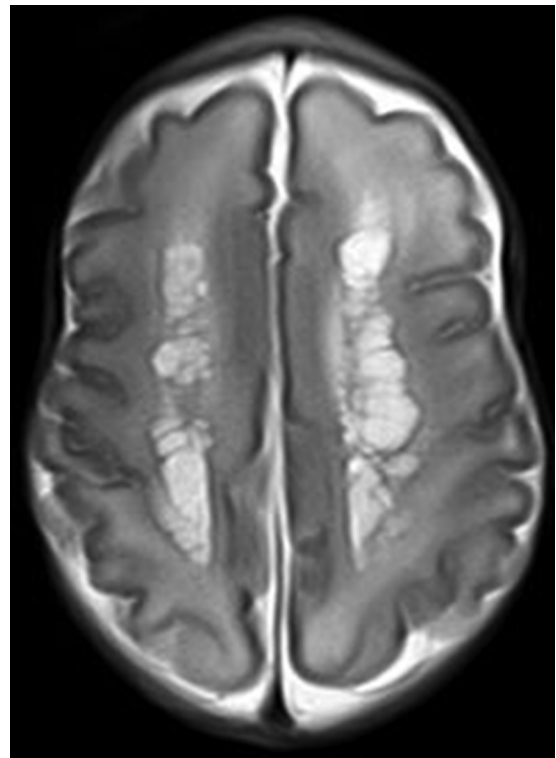

**ON-LINE FIG 4.** Cerebral WM, cystic lesion, extensive bilateral, score 4 (axial T2).

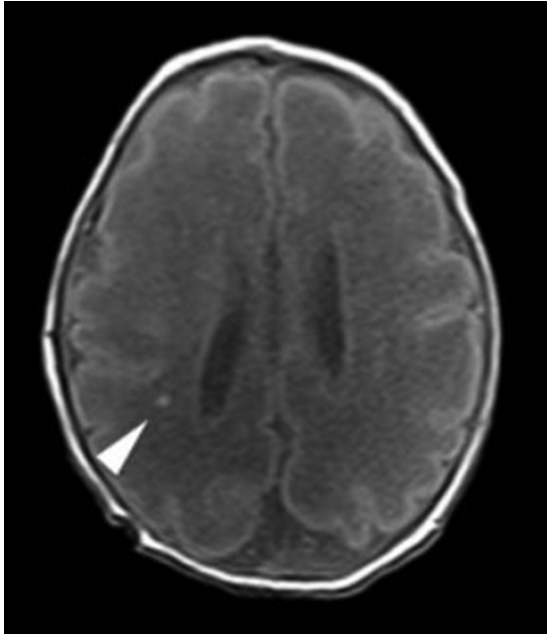

**ON-LINE FIG 5.** Cerebral WM, focal signal abnormality, focal punctate, score 1 (axial T1).

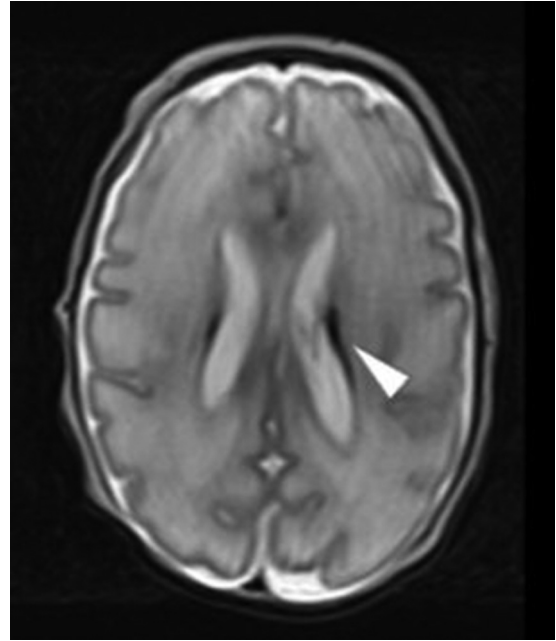

**ON-LINE FIG 7.** Cerebral WM, focal signal abnormality, linear, score 3 (axial T2).

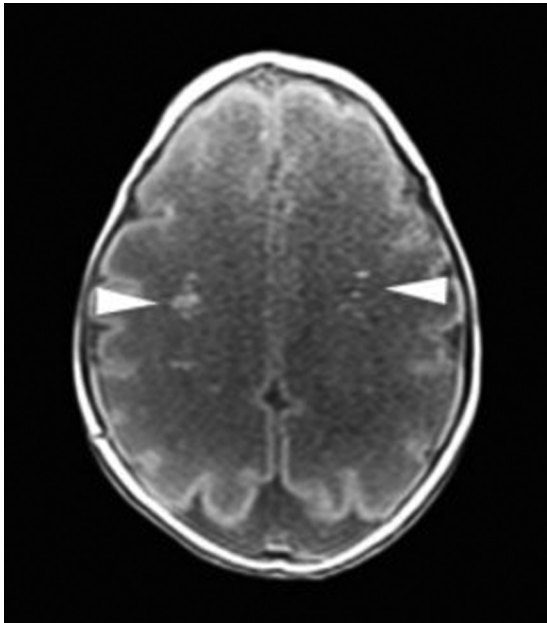

**ON-LINE FIG 6.** Cerebral WM, focal signal abnormality, extensive punctate, score 2 (axial T1).

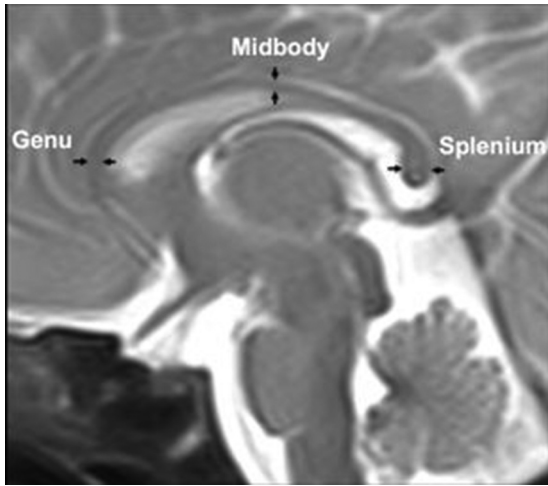

**ON-LINE FIG 8.** Cerebral WM, thinning of the corpus callosum. Measure genu, midbody, and splenium on a midsagittal section (T2) and correct genu and splenium for PMA at MR imaging by using the following equations:  $cGenu = \text{Measured Genu} + 0.03 \times (40\text{-PMA at MRI})$ .  $cSplenium = \text{Measured Splenium} + 0.03 \times (40\text{-PMA at MRI})$ . Score 0:  $cGenu > 1.13$  mm and midbody  $> 0.7$  mm and  $cSplenium > 1.84$  mm. Score 1:  $cGenu < 1.13$  mm or midbody  $< 0.7$  mm or  $cSplenium < 1.84$  mm. Score 2: ( $cGenu < 1.13$  mm or midbody  $< 0.7$  mm) and  $cSplenium < 1.84$  mm.

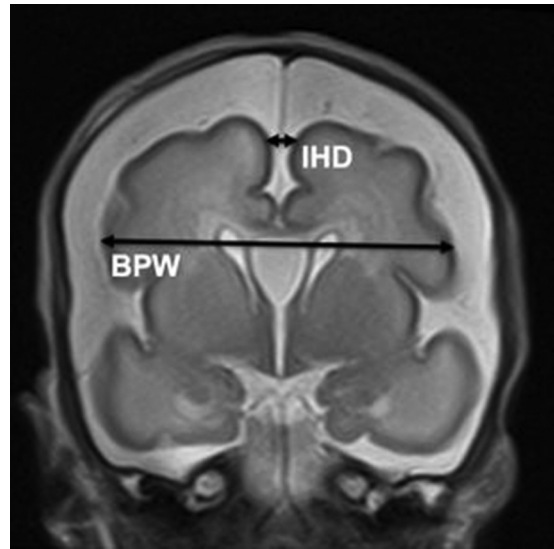

**ON-LINE FIG 10.** Cerebral WM, volume reduction. Measure biparietal width at level of the basilar turn of the cochlea (coronal T2) and correct for PMA at MR imaging by using the following equation:  $\text{Corrected BPW} = \text{Measured BPW} + 2.33 \times (40\text{-PMA at MRI})$ . Score 0:  $cBPW > 78.52$  mm. Score 1:  $74.6$  mm  $< cBPW < 78.52$  mm. Score 2:  $cBPW < 74.6$  mm. Cortical GM, increased extracerebral space (coronal T2). Measure the interhemispheric distance (IHD) between the crowns of the superior frontal gyri at the same section as measurement for BPW. Correct for PMA at MR imaging by using the following equation:  $cIHD = \text{Measured IHD} + 0.16 \times (40\text{-PMA at MRI})$ . Score 0:  $cIHD < 3.98$  mm. Score 1:  $3.98$  mm  $< cIHD < 4.69$  mm. Score 2:  $cIHD > 4.69$  mm.

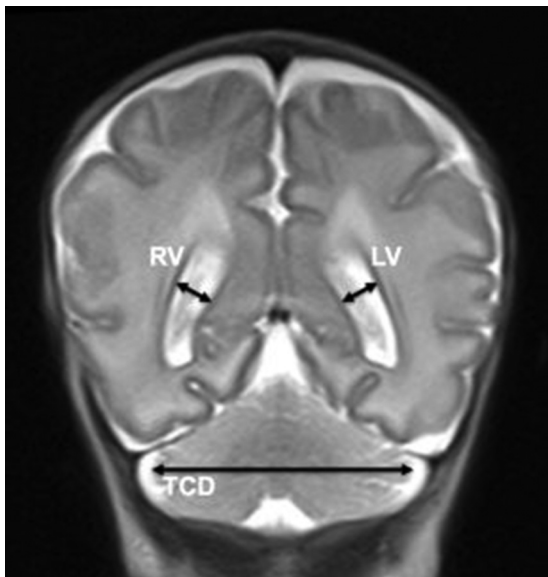

**ON-LINE FIG 9.** Cerebral WM, dilated lateral ventricles. Measure left (LV) and right ventricle (RV) at the level of the ventricular atrium (coronal T2) and correct for PMA at MR imaging by using the following equation:  $cRV = \text{Measured RV} + 0.15 \times (40\text{-PMA at MRI})$ .  $cLV = \text{Measured LV} + 0.13 \times (40\text{-PMA at MRI})$ . Score 0:  $cRV < 9.12$  mm and  $cLV < 8.42$  mm. Score 1: One or both:  $9.12$  mm  $< cRV < 10.39$  mm;  $8.42$  mm  $< cLV < 9.39$  mm. Score 2: One or both:  $cRV > 10.39$  mm;  $cLV > 9.39$  mm. Cerebellum, volume reduction. Measure transverse cerebellar diameter (TCD) at the level of the atria, maximal horizontal distance (coronal T2), correct for PMA at MR imaging by using the following equation:  $cTCD = \text{Measured TCD} + 1.78 \times (40\text{-PMA at MRI})$ . Score 0:  $cTCD > 50.02$  mm. Score 1:  $48.04$  mm  $< cTCD < 50.02$  mm. Score 2:  $cTCD < 48.04$  mm.

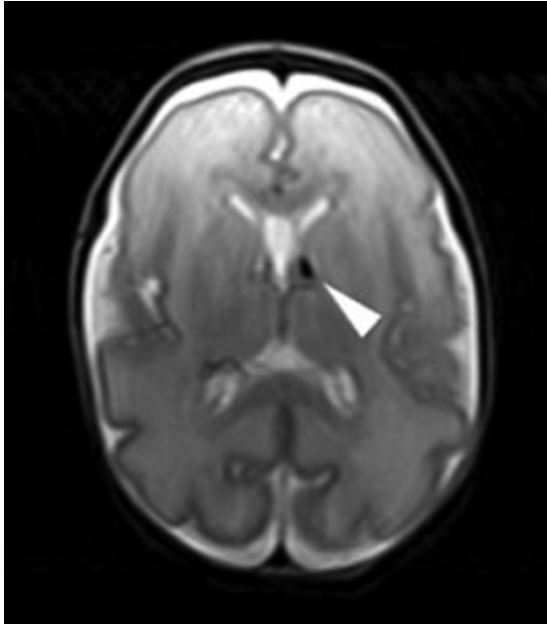

**ON-LINE FIG 11.** Deep GM, signal abnormality, focal unilateral, score 1 (axial T2).

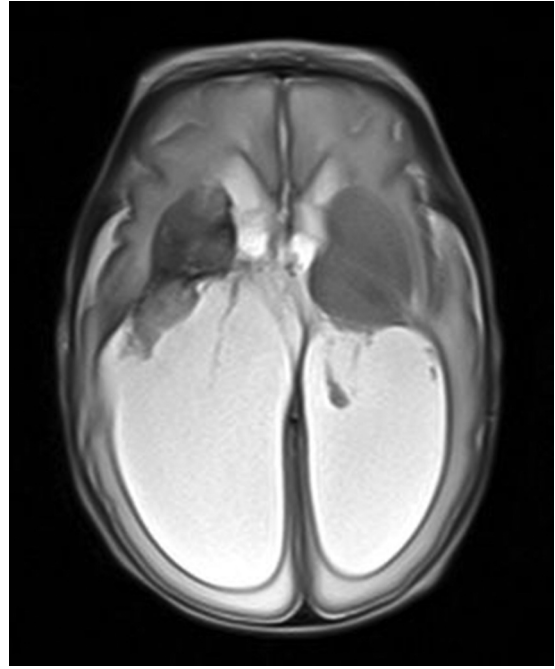

**ON-LINE FIG 13.** Deep GM, signal abnormality, extensive unilateral, score 3 (axial T2).

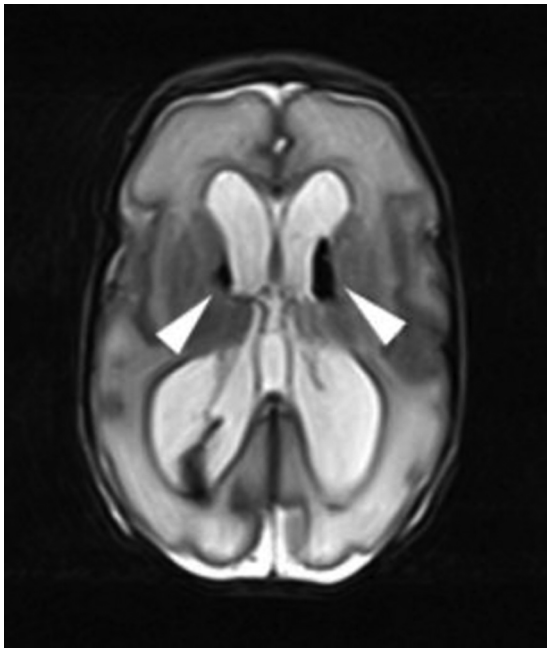

**ON-LINE FIG 12.** Deep GM, signal abnormality, focal bilateral, score 2 (axial T2).

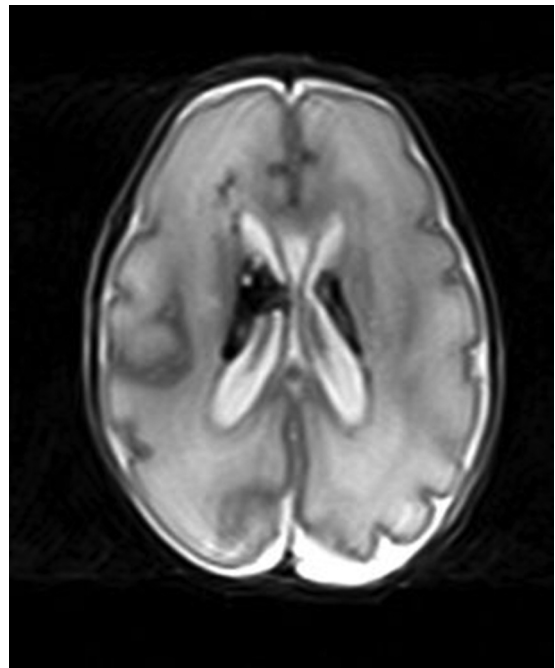

**ON-LINE FIG 14.** Deep GM, signal abnormality, extensive bilateral, score 4 (axial T2).

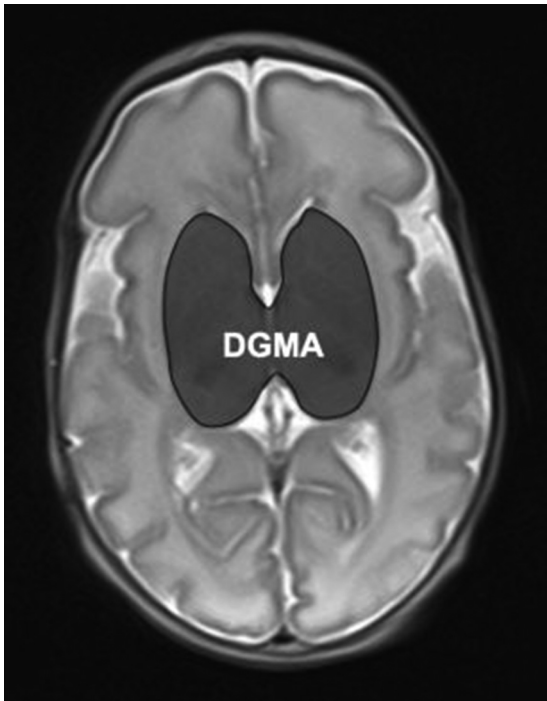

**ON-LINE FIG 15.** Deep GM, volume reduction. Measure deep gray matter area (DGMA) on a single axial section where the caudate heads, lentiform nuclei, and thalami are maximally visible (axial T2). Correct for PMA at MR imaging by using the following equation:  $cDGMA = \text{Measured DGMA} + 0.45 \times (40 - \text{PMA at MRI})$ . Score 0:  $cDGMA > 11.1$  mm. Score 1:  $10.51 \text{ mm} < cDGMA < 11.1$  mm. Score 2:  $cDGMA < 10.51$  mm.

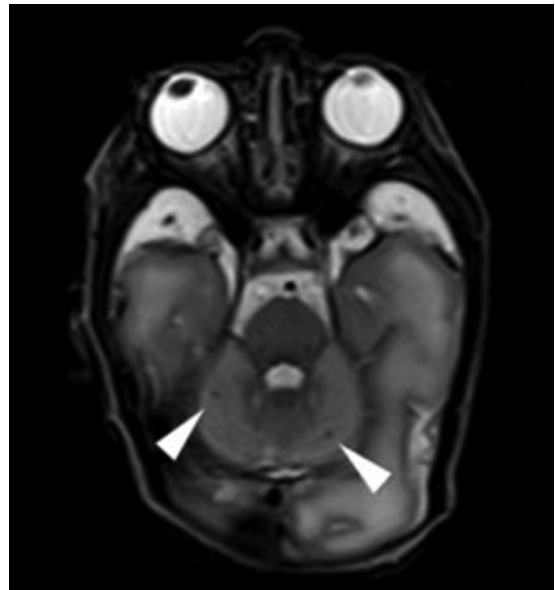

**ON-LINE FIG 17.** Cerebellum, signal abnormality, punctate bilateral, score 2 (axial T2).

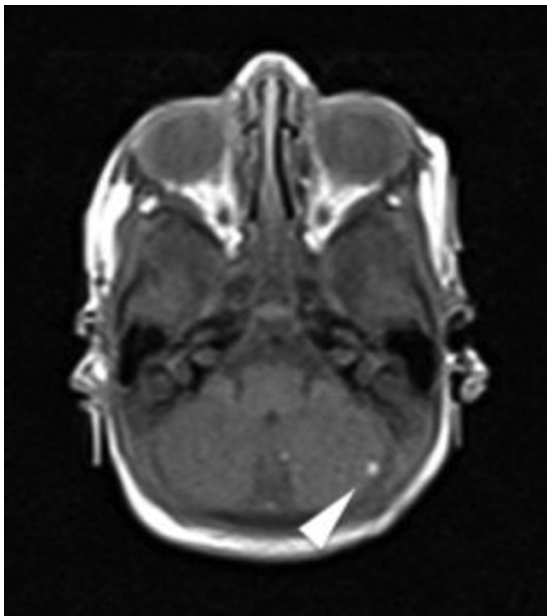

**ON-LINE FIG 16.** Cerebellum, signal abnormality, punctate unilateral, score 1 (axial T1).

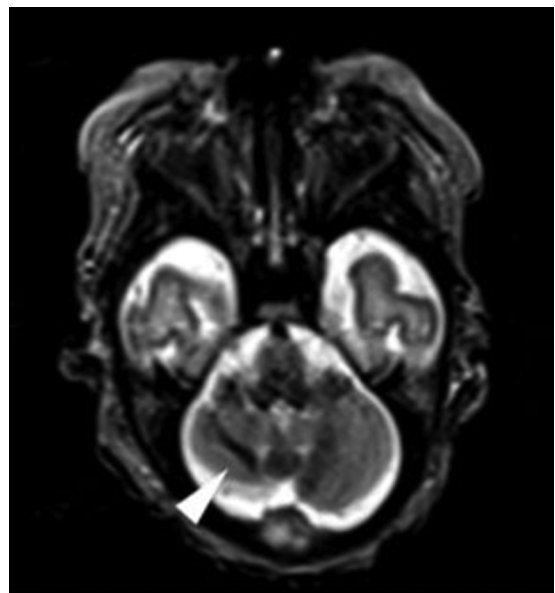

**ON-LINE FIG 18.** Cerebellum, signal abnormality, extensive unilateral, score 3 (axial T2).



**On-line Table 1: Scoring parameters and findings in preterm sample early and term MRI, and term reference sample MRI<sup>a</sup>**

| Score                         |   | Early MRI<br>(n = 83) (t1)                     | Term MRI<br>(n = 77) (t2) | Reference<br>(n = 38) | Difference<br>(t1-t2) (P) |                   |
|-------------------------------|---|------------------------------------------------|---------------------------|-----------------------|---------------------------|-------------------|
| <b>Cerebral WM</b>            |   |                                                |                           |                       |                           |                   |
| Cystic lesions                | 0 | None                                           | 76 (92%)                  | 73 (95%)              | 38 (100%)                 | .71               |
|                               | 1 | Focal unilateral                               | 5 (6%)                    | 2 (3%)                | 0                         |                   |
|                               | 2 | Focal bilateral                                | 1 (1%)                    | 1 (1%)                | 0                         |                   |
|                               | 3 | Extensive unilateral                           | 0                         | 0                     | 0                         |                   |
| Focal signal abnormality      | 4 | Extensive bilateral                            | 1 (1%)                    | 1 (1%)                | 0                         |                   |
|                               | 0 | None                                           | 62 (75%)                  | 66 (86%)              | 38 (100%)                 | .05               |
|                               | 1 | Focal punctate                                 | 12 (14%)                  | 4 (5%)                | 0                         |                   |
|                               | 2 | Extensive punctate                             | 2 (2%)                    | 2 (3%)                | 0                         |                   |
| Myelination delay             | 3 | Linear                                         | 7 (8%)                    | 5 (6%)                | 0                         |                   |
|                               | 0 | Myelinated PLIC and corona radiata             | 0                         | 72 (94%)              | 38 (100%)                 | <.01 <sup>b</sup> |
|                               | 1 | Only PLIC myelinated                           | 0                         | 1 (1%)                | 0                         |                   |
| Thinning of corpus callosum   | 2 | Minimal myelination; no myelin in PLIC         | 83 (100%) <sup>c</sup>    | 4 (5%)                | 0                         |                   |
|                               | 0 | Genu, midbody, and splenium <2 SDs below mean  | 80 (96%)                  | 61 (79%)              | 37 (97%)                  | <.01 <sup>b</sup> |
|                               | 1 | Genu or midbody or splenium >2 SDs below mean  | 1 (1%)                    | 14 (18%)              | 1 (3%)                    |                   |
| Dilated lateral ventricles    | 2 | Genu or midbody and splenium >2 SDs below mean | 2 (2%)                    | 2 (3%)                | 0                         |                   |
|                               | 0 | Both sides within 2 SDs of mean                | 69 (83%)                  | 55 (71%)              | 36 (95%)                  | .24               |
|                               | 1 | One side >2 SDs but <3 SDs above mean          | 6 (7%)                    | 15 (19%)              | 2 (5%)                    |                   |
| Volume reduction              | 2 | One or both sides >3 SDs above mean            | 8 (10%)                   | 7 (9%)                | 0                         |                   |
|                               | 0 | cBPW <2 SDs below mean                         | 34 (41%)                  | 31 (40%)              | 37 (97%)                  | .51               |
|                               | 1 | cBPW >2 SDs below but <3 SDs below mean        | 29 (35%)                  | 27 (35%)              | 1 (3%)                    |                   |
|                               | 2 | cBPW >3 SDs below mean                         | 20 (24%)                  | 19 (25%)              | 0                         |                   |
| <b>Cortical GM</b>            |   |                                                |                           |                       |                           |                   |
| Signal abnormality            | 0 | None                                           | 83 (100%)                 | 76 (99%)              | 38 (100%)                 | .32               |
|                               | 1 | Focal unilateral                               | 0                         | 0                     | 0                         |                   |
|                               | 2 | Focal bilateral                                | 0                         | 1 (1%)                | 0                         |                   |
|                               | 3 | Extensive unilateral                           | 0                         | 0                     | 0                         |                   |
| Gyral maturation              | 4 | Extensive bilateral                            | 0                         | 0                     | 0                         |                   |
|                               | 0 | Delay <2 weeks                                 | 63 (76%)                  | 75 (97%)              | 38 (100%)                 | <.01 <sup>b</sup> |
|                               | 1 | 2 ≤ delay <4 weeks                             | 13 (16%)                  | 2 (3%)                | 0                         |                   |
| Increased extracerebral space | 2 | Delay ≥4 weeks                                 | 7 (8%)                    | 0                     | 0                         |                   |
|                               | 0 | cIHD within 2 SDs of mean                      | 68 (82%)                  | 55 (71%)              | 37 (97%)                  | .06               |
|                               | 1 | cIHD >2 SDs and <3 SDs above mean              | 10 (12%)                  | 7 (9%)                | 1 (3%)                    |                   |
|                               | 2 | cIHD >3 SDs above mean                         | 5 (6%)                    | 15 (19%)              | 0                         |                   |
| <b>Deep GM</b>                |   |                                                |                           |                       |                           |                   |
| Signal abnormality            | 0 | None                                           | 75 (90%)                  | 75 (97%)              | 38 (100%)                 | .01 <sup>b</sup>  |
|                               | 1 | Focal unilateral                               | 5 (6%)                    | 1 (1%)                | 0                         |                   |
|                               | 2 | Focal bilateral                                | 3 (4%)                    | 1 (1%)                | 0                         |                   |
|                               | 3 | Extensive unilateral                           | 0                         | 0                     | 0                         |                   |
| Volume reduction              | 4 | Extensive bilateral                            | 0                         | 0                     | 0                         |                   |
|                               | 0 | cDGMA <2 SDs below mean                        | 59 (71%)                  | 50 (65%)              | 37 (97%)                  | .06               |
|                               | 1 | cDGMA >2 SDs below and <3 SDs below mean       | 17 (20%)                  | 13 (17%)              | 1 (3%)                    |                   |
|                               | 2 | cDGMA >3 SDs below mean                        | 7 (8%)                    | 14 (18%)              | 0                         |                   |
| <b>Cerebellum</b>             |   |                                                |                           |                       |                           |                   |
| Signal abnormality            | 0 | None                                           | 78 (94%)                  | 72 (94%)              | 38 (100%)                 | .32               |
|                               | 1 | Punctate unilateral                            | 4 (5%)                    | 5 (6%)                | 0                         |                   |
|                               | 2 | Punctate bilateral                             | 0                         | 0                     | 0                         |                   |
|                               | 3 | Extensive unilateral                           | 1 (1%)                    | 0                     | 0                         |                   |
| Volume reduction              | 4 | Extensive bilateral                            | 0                         | 0                     | 0                         |                   |
|                               | 0 | cTCD <2 SDs below mean                         | 69 (83%)                  | 54 (70%)              | 37 (97%)                  | .09               |
|                               | 1 | cTCD >2 SDs below and <3 SDs below mean        | 8 (10%)                   | 16 (21%)              | 1 (3%)                    |                   |
|                               | 2 | cTCD >3 SDs below mean                         | 6 (7%)                    | 7 (9%)                | 0                         |                   |

**Note:**—cBPW indicates corrected biparietal width; cDGMA, corrected deep GM area; cTCD corrected transcerebellar diameter; IHD, interhemispheric distance; PLIC, posterior limb of the internal capsule; t1-t2, difference between early and term MRI of preterm infants.

<sup>a</sup> Data are No. (%). Early MRI, 29 to 35 weeks PMA; term MRI, 40 to 42 weeks PMA; mean and SD refer to term reference sample data. *P* < .05 represents a significant difference between early and term MRI scores in the preterm sample.

<sup>b</sup> Significant.

<sup>c</sup> All early MRIs were scored 2 for myelination delay to represent “unmyelinated PLIC and corona radiata.”

**On-line Table 2: Structural MRI scoring system for use from 29- to 46-weeks PMA in preterm infants: score sheet<sup>a</sup>**

Date:

Patient ID:

Postmenstrual age at MRI:

|                                                | Score 0                                                                                                                                                                                                                                                                                                                                                                                                                                                                           | Score 1                                                                                                                                                                                                                                                                                                                                                                                                                                                                           | Score 2                                                                                                                                                                                                                                                                                                                                                                                                                                                                           | Score 3                                                                                                                                                                                                                                                                                                                                                                                                                                                                           | Score 4                                                                                                                                                                                                                                                                                                                                                                                                                                                                           | Total Score                     |
|------------------------------------------------|-----------------------------------------------------------------------------------------------------------------------------------------------------------------------------------------------------------------------------------------------------------------------------------------------------------------------------------------------------------------------------------------------------------------------------------------------------------------------------------|-----------------------------------------------------------------------------------------------------------------------------------------------------------------------------------------------------------------------------------------------------------------------------------------------------------------------------------------------------------------------------------------------------------------------------------------------------------------------------------|-----------------------------------------------------------------------------------------------------------------------------------------------------------------------------------------------------------------------------------------------------------------------------------------------------------------------------------------------------------------------------------------------------------------------------------------------------------------------------------|-----------------------------------------------------------------------------------------------------------------------------------------------------------------------------------------------------------------------------------------------------------------------------------------------------------------------------------------------------------------------------------------------------------------------------------------------------------------------------------|-----------------------------------------------------------------------------------------------------------------------------------------------------------------------------------------------------------------------------------------------------------------------------------------------------------------------------------------------------------------------------------------------------------------------------------------------------------------------------------|---------------------------------|
| Cerebral WM                                    |                                                                                                                                                                                                                                                                                                                                                                                                                                                                                   |                                                                                                                                                                                                                                                                                                                                                                                                                                                                                   |                                                                                                                                                                                                                                                                                                                                                                                                                                                                                   |                                                                                                                                                                                                                                                                                                                                                                                                                                                                                   |                                                                                                                                                                                                                                                                                                                                                                                                                                                                                   |                                 |
| Cystic lesions                                 | None                                                                                                                                                                                                                                                                                                                                                                                                                                                                              | Focal unilateral (On-line Fig 1)                                                                                                                                                                                                                                                                                                                                                                                                                                                  | Focal bilateral (On-line Fig 2)                                                                                                                                                                                                                                                                                                                                                                                                                                                   | Extensive unilateral (On-line Fig 3)                                                                                                                                                                                                                                                                                                                                                                                                                                              | Extensive bilateral (On-line Fig 4)                                                                                                                                                                                                                                                                                                                                                                                                                                               |                                 |
| Focal signal abnormality                       | None                                                                                                                                                                                                                                                                                                                                                                                                                                                                              | Focal punctate (On-line Fig 5)                                                                                                                                                                                                                                                                                                                                                                                                                                                    | Extensive punctate (On-line Fig 6)                                                                                                                                                                                                                                                                                                                                                                                                                                                | Linear (On-line Fig 7)                                                                                                                                                                                                                                                                                                                                                                                                                                                            |                                                                                                                                                                                                                                                                                                                                                                                                                                                                                   |                                 |
| Myelination delay                              | Myelinated PLIC and corona radiata                                                                                                                                                                                                                                                                                                                                                                                                                                                | Only PLIC myelinated                                                                                                                                                                                                                                                                                                                                                                                                                                                              | Minimal myelination; no myelin in PLIC                                                                                                                                                                                                                                                                                                                                                                                                                                            |                                                                                                                                                                                                                                                                                                                                                                                                                                                                                   |                                                                                                                                                                                                                                                                                                                                                                                                                                                                                   |                                 |
| Thinning of corpus callosum (On-line Fig 8)    | Measure genu, midbody, and splenium on a midsagittal section and correct genu and splenium for PMA at MRI using equations:<br>cGenu = Measured Genu + 0.03 × (40-PMA at MRI)<br>cSplenium = Measured Splenium + 0.03 × (40-PMA at MRI)<br>cGenu > 1.13 mm and midbody > 0.7 mm and cSplenium > 1.84 mm                                                                                                                                                                            | cGenu < 1.13 mm or midbody < 0.7 mm or cSplenium < 1.84 mm                                                                                                                                                                                                                                                                                                                                                                                                                        | (cGenu < 1.13 mm or midbody < 0.7 mm) and cSplenium < 1.84 mm                                                                                                                                                                                                                                                                                                                                                                                                                     |                                                                                                                                                                                                                                                                                                                                                                                                                                                                                   |                                                                                                                                                                                                                                                                                                                                                                                                                                                                                   |                                 |
| Dilated lateral ventricles (On-line Fig 9)     | Measure left and right ventricle at level of ventricular atrium and correct for PMA at MRI using equations:<br>cRV = Measured RV + 0.15 × (40-PMA at MRI)<br>cLV = Measured LV + 0.13 × (40-PMA at MRI)<br>cRV < 9.12 mm and cLV < 8.42 mm                                                                                                                                                                                                                                        | 1 or both:<br>9.12 mm < cRV < 10.39 mm<br>8.42 mm < cLV < 9.39 mm                                                                                                                                                                                                                                                                                                                                                                                                                 | 1 or both:<br>cRV > 10.39 mm<br>cLV > 9.39 mm                                                                                                                                                                                                                                                                                                                                                                                                                                     |                                                                                                                                                                                                                                                                                                                                                                                                                                                                                   |                                                                                                                                                                                                                                                                                                                                                                                                                                                                                   |                                 |
| Volume reduction (On-line Figure 10)           | Measure biparietal width at level of the basilar turn of the cochlea and correct for PMA at MRI using equation:<br>cBPW = Measured BPW + 2.33 × (40-PMA at MRI)<br>cBPW > 78.52 mm                                                                                                                                                                                                                                                                                                | 74.6 mm < cBPW < 78.52 mm                                                                                                                                                                                                                                                                                                                                                                                                                                                         | cBPW < 74.6 mm                                                                                                                                                                                                                                                                                                                                                                                                                                                                    |                                                                                                                                                                                                                                                                                                                                                                                                                                                                                   |                                                                                                                                                                                                                                                                                                                                                                                                                                                                                   | WM total = (range 0-15)         |
| Cortical GM                                    |                                                                                                                                                                                                                                                                                                                                                                                                                                                                                   |                                                                                                                                                                                                                                                                                                                                                                                                                                                                                   |                                                                                                                                                                                                                                                                                                                                                                                                                                                                                   |                                                                                                                                                                                                                                                                                                                                                                                                                                                                                   |                                                                                                                                                                                                                                                                                                                                                                                                                                                                                   |                                 |
| Signal abnormality                             | None                                                                                                                                                                                                                                                                                                                                                                                                                                                                              | Focal unilateral                                                                                                                                                                                                                                                                                                                                                                                                                                                                  | Focal bilateral                                                                                                                                                                                                                                                                                                                                                                                                                                                                   | Extensive unilateral                                                                                                                                                                                                                                                                                                                                                                                                                                                              | Extensive bilateral                                                                                                                                                                                                                                                                                                                                                                                                                                                               |                                 |
| Gyral maturation                               | 34- to 36-wk PMA: marginal sulcus and paracentral gyrus present; secondary sulci in frontal lobes, superior and middle temporal and prerolandic, postrolandic, insula, and occipital regions present; 36- to 38-week PMA: additional secondary gyri in transverse and inferior temporal regions; anterior and posterior orbital gyri established; 40-week PMA: tertiary inferior temporal and inferior occipital gyri and sulci (Inder et al, 2003 <sup>8</sup> )<br>Delay < 2 wk | 34- to 36-wk PMA: marginal sulcus and paracentral gyrus present; secondary sulci in frontal lobes, superior and middle temporal and prerolandic, postrolandic, insula, and occipital regions present; 36- to 38-week PMA: additional secondary gyri in transverse and inferior temporal regions; anterior and posterior orbital gyri established; 40-week PMA: tertiary inferior temporal and inferior occipital gyri and sulci (Inder et al, 2003 <sup>8</sup> )<br>Delay ≥ 4 wk | 34- to 36-wk PMA: marginal sulcus and paracentral gyrus present; secondary sulci in frontal lobes, superior and middle temporal and prerolandic, postrolandic, insula, and occipital regions present; 36- to 38-week PMA: additional secondary gyri in transverse and inferior temporal regions; anterior and posterior orbital gyri established; 40-week PMA: tertiary inferior temporal and inferior occipital gyri and sulci (Inder et al, 2003 <sup>8</sup> )<br>Delay ≥ 4 wk | 34- to 36-wk PMA: marginal sulcus and paracentral gyrus present; secondary sulci in frontal lobes, superior and middle temporal and prerolandic, postrolandic, insula, and occipital regions present; 36- to 38-week PMA: additional secondary gyri in transverse and inferior temporal regions; anterior and posterior orbital gyri established; 40-week PMA: tertiary inferior temporal and inferior occipital gyri and sulci (Inder et al, 2003 <sup>8</sup> )<br>Delay ≥ 4 wk | 34- to 36-wk PMA: marginal sulcus and paracentral gyrus present; secondary sulci in frontal lobes, superior and middle temporal and prerolandic, postrolandic, insula, and occipital regions present; 36- to 38-week PMA: additional secondary gyri in transverse and inferior temporal regions; anterior and posterior orbital gyri established; 40-week PMA: tertiary inferior temporal and inferior occipital gyri and sulci (Inder et al, 2003 <sup>8</sup> )<br>Delay ≥ 4 wk |                                 |
| Increased extracerebral space (On-line Fig 10) | Measure interhemispheric distance between crowns of superior frontal gyri at same section as measurement for BPW; correct for PMA at MRI using equation:<br>cIHD = Measured IHD + 0.16 × (40-PMA at MRI)<br>cIHD < 3.98 mm                                                                                                                                                                                                                                                        | 3.98 mm < cIHD < 4.69 mm                                                                                                                                                                                                                                                                                                                                                                                                                                                          | cIHD > 4.69 mm                                                                                                                                                                                                                                                                                                                                                                                                                                                                    |                                                                                                                                                                                                                                                                                                                                                                                                                                                                                   |                                                                                                                                                                                                                                                                                                                                                                                                                                                                                   | Cortical GM total = (range 0-8) |

Continued on next page

**On-line Table 2:** Continued

|                                      | Score 0                                                                                                                                                                                                                                    | Score 1                                 | Score 2                                | Score 3                                  | Score 4                                 | Total Score                                                   |
|--------------------------------------|--------------------------------------------------------------------------------------------------------------------------------------------------------------------------------------------------------------------------------------------|-----------------------------------------|----------------------------------------|------------------------------------------|-----------------------------------------|---------------------------------------------------------------|
| Deep GM                              |                                                                                                                                                                                                                                            |                                         |                                        |                                          |                                         |                                                               |
| Signal abnormality                   | None                                                                                                                                                                                                                                       | Focal unilateral<br>(On-line Fig 11)    | Focal bilateral<br>(On-line Fig 12)    | Extensive unilateral<br>(On-line Fig 13) | Extensive bilateral<br>(On-line Fig 14) |                                                               |
| Volume reduction<br>(On-line Fig 15) | Measure DGMA on a single axial section where caudate heads, lentiform nuclei, and thalami are maximally visible; correct for PMA at MRI using equation:<br>cDGMA = Measured DGMA + $0.45 \times (40\text{-PMA at MRI})$<br>cDGMA > 11.1 mm | 10.51 mm < cDGMA < 11.1 mm              | cDGMA < 10.51 mm                       |                                          |                                         | Deep GM total = (range 0–6)                                   |
| Cerebellum                           |                                                                                                                                                                                                                                            |                                         |                                        |                                          |                                         |                                                               |
| Signal abnormality                   | None                                                                                                                                                                                                                                       | Punctate unilateral<br>(On-line Fig 16) | Punctate bilateral<br>(On-line Fig 17) | Extensive unilateral<br>(On-line Fig 18) | Extensive bilateral                     |                                                               |
| Volume reduction<br>(On-line Fig 9)  | Measure trans cerebellar diameter at level of atria, maximal horizontal distance; correct for PMA at MRI using equation:<br>cTCD = Measured TCD + $1.78 \times (40\text{-PMA at MRI})$<br>cTCD > 50.02 mm                                  | 48.04 mm < cTCD < 50.02 mm              | cTCD < 48.04 mm                        |                                          |                                         | Cerebellum total = (range 0–6)<br>Global total = (range 0–35) |

**Note:**—BPW indicates biparietal width; c, corrected; IHD, interhemispheric distance; RV, right ventricle; LV, left ventricle; TCD, trans cerebellar diameter; DGMA, deep gray matter area; PLC, posterior limb of the internal capsule.  
<sup>a</sup> Global total range 0–35; global score category (0–3 normal; 4–7 mild; 8–11 moderate; 12+ severe).



**On-line Table 3: Relationship between PMA at MRI and each regional measurement<sup>a</sup>**

|                            | Preterm Sample (n = 135)<br>(n = 71 Early MRI, n = 64 Term MRI) |            |                   | Term Reference Sample (n = 38) |            |                  |
|----------------------------|-----------------------------------------------------------------|------------|-------------------|--------------------------------|------------|------------------|
|                            | Regression Coefficient                                          | 95% CI     | P                 | Regression Coefficient         | 95% CI     | P                |
| Corpus callosum genu       | 0.03                                                            | 0.01–0.05  | .01 <sup>b</sup>  | 0.28                           | 0.02–0.53  | .03 <sup>b</sup> |
| Corpus callosum body       | 0.01                                                            | –0.01–0.02 | .33               | –0.03                          | –0.19–0.12 | .64              |
| Corpus callosum splenium   | 0.03                                                            | 0.01–0.04  | <.01 <sup>b</sup> | 0.04                           | –0.15–0.23 | .67              |
| Ventricular diameter right | 0.15                                                            | 0.11–0.18  | <.01 <sup>b</sup> | 0.35                           | –0.06–0.76 | .09              |
| Ventricular diameter left  | 0.13                                                            | 0.1–0.16   | <.01 <sup>b</sup> | 0.10                           | –0.22–0.43 | .51              |
| Biparietal width           | 2.33                                                            | 2.19–2.48  | <.01 <sup>b</sup> | 0.00                           | –1.32–1.33 | .99              |
| Interhemispheric distance  | 0.16                                                            | 0.12–0.2   | <.01 <sup>b</sup> | 0.03                           | –0.21–0.27 | .78              |
| Deep gray matter area      | 0.45                                                            | 0.42–0.47  | <.01 <sup>b</sup> | 0.11                           | –0.09–0.3  | .27              |
| Transcerebellar diameter   | 1.78                                                            | 1.72–1.84  | <.01 <sup>b</sup> | 0.99                           | 0.33–1.66  | .01 <sup>b</sup> |

<sup>a</sup> Early MRI, 29 to 35 weeks PMA; term MRI, 40 to 42 weeks PMA. Preterm sample cases with focal brain lesions were removed to ensure that any linear relationship found was the result of age and not confounded by brain injury. Regression analyses were conducted separately for the preterm and term samples.

<sup>b</sup> Significant.

**On-line Table 4: Corrected means and SDs of the regional measurements for early and term MRI for the preterm group and the term reference sample<sup>a</sup>**

|                            | Early MRI (n = 83)       | Term MRI (n = 77)        | Term Reference Sample (n = 38) |
|----------------------------|--------------------------|--------------------------|--------------------------------|
| Corpus callosum genu       | 1.96 (0.43)              | 1.91 (0.67)              | 2.63 (0.75)                    |
| Corpus callosum body       | 1.33 (0.28) <sup>b</sup> | 1.40 (0.43) <sup>b</sup> | 1.60 (0.45) <sup>b</sup>       |
| Corpus callosum splenium   | 2.71 (0.51)              | 2.61 (0.62)              | 2.98 (0.57) <sup>b</sup>       |
| Ventricular diameter right | 7.43 (3.29)              | 7.49 (3.58)              | 6.48 (0.97) <sup>b</sup>       |
| Ventricular diameter left  | 7.51 (3.20)              | 7.70 (4)                 | 6.58 (1.3) <sup>b</sup>        |
| Biparietal width           | 77.40 (4.47)             | 77.40 (5.44)             | 86.38 (3.93) <sup>b</sup>      |
| Interhemispheric distance  | 3.27 (0.79)              | 3.50 (1.33)              | 2.56 (0.71) <sup>b</sup>       |
| Deep gray matter area      | 11.48 (0.82)             | 11.44 (1.01)             | 12.28 (0.59) <sup>b</sup>      |
| Transcerebellar diameter   | 51.55 (2.53)             | 51.34 (2.73)             | 53.98 (1.98)                   |

<sup>a</sup> For each measure that demonstrated a linear relationship with PMA at MRI in On-line Table 3, the regression coefficient (slope) was used to generate an equation for correction, written as: Corrected Value = Measured Value + Regression Coefficient × (40–PMA at MRI). A single equation was used to correct early and term MRI regional measures for the preterm group. The term reference sample data were corrected separately.

<sup>b</sup> Uncorrected values—that is, for regional measures in which no linear relationship was found and no correction was performed.

**On-line Table 5: Inter- and intrarater reproducibility of early and term MRI scores<sup>a</sup>**

|                  | Interrater (n = 20)      |             | Intrarater (n = 20)      |             |
|------------------|--------------------------|-------------|--------------------------|-------------|
|                  | Reliability ICC (95% CI) | % Agreement | Reliability ICC (95% CI) | % Agreement |
| Early MRI scores |                          |             |                          |             |
| WM               | 0.79 (0.47–0.92)         | 70          | 0.97 (0.93–0.99)         | 95          |
| CGM              | 0.08 (0.00–0.63)         | 95          | 0.92 (0.80–0.97)         | 100         |
| DGM              | 0.86 (0.64–0.94)         | 85          | 0.92 (0.81–0.97)         | 90          |
| Cerebellum       | 0.76 (0.40–0.91)         | 95          | 0.82 (0.51–0.93)         | 95          |
| Global           | 0.89 (0.72–0.96)         | 80          | 0.97 (0.91–0.99)         | 95          |
| Term MRI scores  |                          |             |                          |             |
| WM               | 0.93 (0.82–0.97)         | 90          | 0.96 (0.89–0.98)         | 90          |
| CGM              | 0.66 (0.15–0.87)         | 90          | 0.75 (0.32–0.91)         | 95          |
| DGM              | 0.86 (0.66–0.95)         | 90          | 0.96 (0.89–0.98)         | 100         |
| Cerebellum       | 0.91 (0.78–0.97)         | 100         | 0.91 (0.77–0.97)         | 100         |
| Global           | 0.93 (0.82–0.97)         | 80          | 0.97 (0.92–0.99)         | 95          |

<sup>a</sup> “% Agreement” is defined as an exact agreement ±1 point for subscale scores and exact agreement ±2 points for global scores.

**On-line Table 6: Perinatal variables and grade of global brain abnormality in infants born <31-week gestational age<sup>a</sup>**

| Variables                     | Global Brain Abnormality            |                                     |                                     |                                     |                                     |                                     |                                     |                                     |                                     |                                     |                                     |                                     | P Value                             |                   |                   |                  |
|-------------------------------|-------------------------------------|-------------------------------------|-------------------------------------|-------------------------------------|-------------------------------------|-------------------------------------|-------------------------------------|-------------------------------------|-------------------------------------|-------------------------------------|-------------------------------------|-------------------------------------|-------------------------------------|-------------------|-------------------|------------------|
|                               | Normal (Score, 0–3)                 |                                     |                                     | Mild (Score, 4–7)                   |                                     |                                     | Moderate (Score, 8–11)              |                                     |                                     | Severe (Score, ≥12)                 |                                     |                                     | Early MRI                           | Term MRI          |                   |                  |
|                               | Early MRI (n = 28)                  | Term MRI (n = 49)                   | Early MRI (n = 41)                  | Term MRI (n = 20)                   | Early MRI (n = 10)                  | Term MRI (n = 5)                    | Early MRI (n = 4)                   | Term MRI (n = 3)                    | Early MRI (n = 4)                   | Term MRI (n = 3)                    |                                     |                                     |                                     |                   |                   |                  |
| Gestational age at birth (wk) | 28 <sup>+6</sup> (1 <sup>+5</sup> ) | 28 <sup>+3</sup> (1 <sup>+6</sup> ) | 27 <sup>+6</sup> (1 <sup>+6</sup> ) | 28 <sup>+2</sup> (1 <sup>+3</sup> ) | 27 <sup>+3</sup> (2 <sup>+0</sup> ) | 25 <sup>+3</sup> (1 <sup>+0</sup> ) | 27 <sup>+0</sup> (2 <sup>+4</sup> ) | 27 <sup>+3</sup> (2 <sup>+6</sup> ) | 27 <sup>+0</sup> (2 <sup>+4</sup> ) | 27 <sup>+3</sup> (2 <sup>+6</sup> ) | 27 <sup>+3</sup> (2 <sup>+6</sup> ) | 27 <sup>+0</sup> (2 <sup>+4</sup> ) | 27 <sup>+3</sup> (2 <sup>+6</sup> ) | .04 <sup>b</sup>  | .03 <sup>b</sup>  |                  |
| Birth weight (g)              | 1213 (266)                          | 1145 (318)                          | 1018 (305)                          | 1001 (280)                          | 913 (306)                           | 820 (94)                            | 974 (427)                           | 878 (587)                           | 974 (427)                           | 878 (587)                           | 820 (94)                            | 974 (427)                           | 878 (587)                           | <.01 <sup>b</sup> | .04 <sup>b</sup>  |                  |
| Male sex                      | 17 (6.1%)                           | 30 (6.1%)                           | 24 (5.9%)                           | 12 (6.0%)                           | 5 (5.0%)                            | 3 (6.0%)                            | 3 (7.5%)                            | 1 (3.3%)                            | 3 (7.5%)                            | 1 (3.3%)                            | 3 (6.0%)                            | 3 (7.5%)                            | 1 (3.3%)                            | .85               | .64               |                  |
| Multiple births               | 8 (2.9%)                            | 12 (2.5%)                           | 12 (2.9%)                           | 7 (3.5%)                            | 4 (4.0%)                            | 2 (4.0%)                            | 0 (0%)                              | 0 (0%)                              | 4 (4.0%)                            | 2 (4.0%)                            | 2 (4.0%)                            | 0 (0%)                              | 0 (0%)                              | .95               | .58               |                  |
| Maternal PROM                 | 10 (3.6%)                           | 14 (2.9%)                           | 7 (1.7%)                            | 2 (1.0%)                            | 1 (1.0%)                            | 1 (2.0%)                            | 1 (2.5%)                            | 1 (3.3%)                            | 1 (1.0%)                            | 1 (2.0%)                            | 1 (2.5%)                            | 1 (2.5%)                            | 1 (3.3%)                            | .07               | .23               |                  |
| Chorioamnionitis              | 8 (2.9%)                            | 9 (1.8%)                            | 5 (1.2%)                            | 3 (1.5%)                            | 0 (0%)                              | 0 (0%)                              | 1 (2.5%)                            | 0 (0%)                              | 1 (1.0%)                            | 0 (0%)                              | 0 (0%)                              | 1 (2.5%)                            | 1 (3.3%)                            | .05               | .66               |                  |
| Antenatal steroids            | 23 (8.2%)                           | 36 (7.4%)                           | 29 (7.1%)                           | 17 (8.5%)                           | 8 (8.0%)                            | 1 (2.0%)                            | 2 (5.0%)                            | 3 (10.0%)                           | 8 (8.0%)                            | 1 (2.0%)                            | 4 (8.0%)                            | 2 (5.0%)                            | 3 (10.0%)                           | .30               | .88               |                  |
| Higher social risk            | 11 (4.1%)                           | 16 (3.3%)                           | 19 (4.6%)                           | 12 (6.0%)                           | 7 (7.0%)                            | 4 (8.0%)                            | 2 (5.0%)                            | 2 (6.7%)                            | 7 (7.0%)                            | 4 (8.0%)                            | 2 (4.0%)                            | 2 (5.0%)                            | 2 (6.7%)                            | .21               | <.01 <sup>b</sup> |                  |
| PDA                           | 7 (2.5%)                            | 21 (4.3%)                           | 24 (5.9%)                           | 8 (4.0%)                            | 5 (5.0%)                            | 5 (10.0%)                           | 3 (7.5%)                            | 2 (6.7%)                            | 5 (5.0%)                            | 5 (10.0%)                           | 5 (10.0%)                           | 3 (7.5%)                            | 2 (6.7%)                            | .01 <sup>b</sup>  | .19               |                  |
| Maternal MgSO <sub>4</sub>    | 16 (6.4%)                           | 26 (5.9%)                           | 20 (6.3%)                           | 12 (7.5%)                           | 6 (8.6%)                            | 2 (10.0%)                           | 3 (7.5%)                            | 1 (10.0%)                           | 6 (8.6%)                            | 2 (10.0%)                           | 4 (8.0%)                            | 3 (7.5%)                            | 3 (10.0%)                           | .67               | .11               |                  |
| Cesarean delivery             | 20 (7.1%)                           | 34 (6.9%)                           | 30 (7.3%)                           | 15 (7.5%)                           | 7 (7.0%)                            | 4 (8.0%)                            | 3 (7.5%)                            | 3 (10.0%)                           | 7 (7.0%)                            | 4 (8.0%)                            | 4 (8.0%)                            | 3 (7.5%)                            | 3 (10.0%)                           | .95               | .32               |                  |
| ROP                           | 7 (2.5%)                            | 14 (2.9%)                           | 20 (4.9%)                           | 13 (6.5%)                           | 8 (8.0%)                            | 4 (8.0%)                            | 3 (7.5%)                            | 2 (6.7%)                            | 8 (8.0%)                            | 4 (8.0%)                            | 4 (8.0%)                            | 3 (7.5%)                            | 2 (6.7%)                            | <.01 <sup>b</sup> | <.01 <sup>b</sup> |                  |
| NEC                           | 1 (4%)                              | 1 (2%)                              | 0 (0%)                              | 0 (0%)                              | 0 (0%)                              | 0 (0%)                              | 0 (0%)                              | 0 (0%)                              | 0 (0%)                              | 0 (0%)                              | 0 (0%)                              | 2 (5.0%)                            | 1 (3.3%)                            | .22               | .50               |                  |
| Confirmed sepsis              | 2 (7%)                              | 2 (4%)                              | 1 (2%)                              | 0 (0%)                              | 0 (0%)                              | 0 (0%)                              | 0 (0%)                              | 0 (0%)                              | 0 (0%)                              | 0 (0%)                              | 0 (0%)                              | 0 (0%)                              | 0 (0%)                              | .26               | .41               |                  |
| TPN (days)                    | 10 [6–13]                           | 11 [8–14]                           | 12 [8–15]                           | 11 [7–14]                           | 13 [8–14]                           | 14 [14–19]                          | 18 [6–28]                           | 11 [ND]                             | 13 [8–14]                           | 14 [14–19]                          | 14 [14–19]                          | 18 [6–28]                           | 11 [ND]                             | .12               | .17               |                  |
| Postnatal corticosteroids     | 1 (4%)                              | 7 (1.4%)                            | 7 (1.7%)                            | 3 (1.5%)                            | 3 (3.0%)                            | 2 (4.0%)                            | 3 (7.5%)                            | 2 (6.7%)                            | 3 (3.0%)                            | 2 (4.0%)                            | 3 (7.5%)                            | 3 (7.5%)                            | 2 (6.7%)                            | <.01              | .11               |                  |
| Ventilation (days)            | 2 [0–3]                             | 2 [0–8]                             | 3 [2–18]                            | 3 [0–7]                             | 3 [2–34]                            | 30 [11–42]                          | 31 [8–35]                           | 20 [ND]                             | 3 [2–34]                            | 30 [11–42]                          | 30 [11–42]                          | 31 [8–35]                           | 20 [ND]                             | .04 <sup>b</sup>  | .04 <sup>b</sup>  |                  |
| CPAP (days)                   | 12 [4–21]                           | 18 [6–46]                           | 17 [8–32]                           | 33 [9–52]                           | 15 [10–27]                          | 50 [37–55]                          | 7 [3–23]                            | 32 [ND]                             | 15 [10–27]                          | 50 [37–55]                          | 50 [37–55]                          | 7 [3–23]                            | 32 [ND]                             | .14               | .12               |                  |
| Oxygen therapy (hr)           | 5 [1–42]                            | 46 [2–386]                          | 51 [5–253]                          | 6 [1–62]                            | 1 [1–774]                           | 512 [ND]                            | 665 [114–1358]                      | 1958 [ND]                           | 6 [1–62]                            | 512 [ND]                            | 512 [ND]                            | 665 [114–1358]                      | 1958 [ND]                           | .01 <sup>b</sup>  | .57               |                  |
| BPD                           | NA                                  | 11 (22%)                            | NA                                  | 6 (30%)                             | NA                                  | 4 (80%)                             | NA                                  | 2 (67%)                             | NA                                  | 4 (80%)                             | 4 (80%)                             | NA                                  | 2 (67%)                             | NA                | NA                | .02 <sup>b</sup> |
| Home oxygen                   | NA                                  | 5 (100%)                            | NA                                  | 4 (20%)                             | NA                                  | 3 (60%)                             | NA                                  | 1 (33%)                             | NA                                  | 3 (60%)                             | 3 (60%)                             | NA                                  | 1 (33%)                             | NA                | NA                | .02 <sup>b</sup> |

**Note:**—PDA indicates patent ductus arteriosus; PROM, premature rupture of membranes; ROP, retinopathy of prematurity; TPN, total parenteral nutrition; MgSO<sub>4</sub>, magnesium sulfate; NA, not applicable; ND, not determinable due to small sample size; BPD, bronchopulmonary dysplasia [oxygen requirement at 36 weeks PMA]; NEC, necrotizing enterocolitis; CPAP, continuous positive airway pressure.

<sup>a</sup> Continuous measures reported as mean (SD) or median [IQR]. Categorical measures are reported as frequency (percentage). P value < .05 indicates a significant association between the perinatal variable and increasing severity of MRI global brain abnormality category score.

<sup>b</sup> Significant.
